# Supplementary material for: A Novel Protein LZTFL1 Regulates Ciliary Trafficking of the BBSome and Smoothened
Source: PubMed Central journal article supplement (PMC3207910; doi:10.1371/journal.pgen.1002358), 2011-11-03

Figure S4

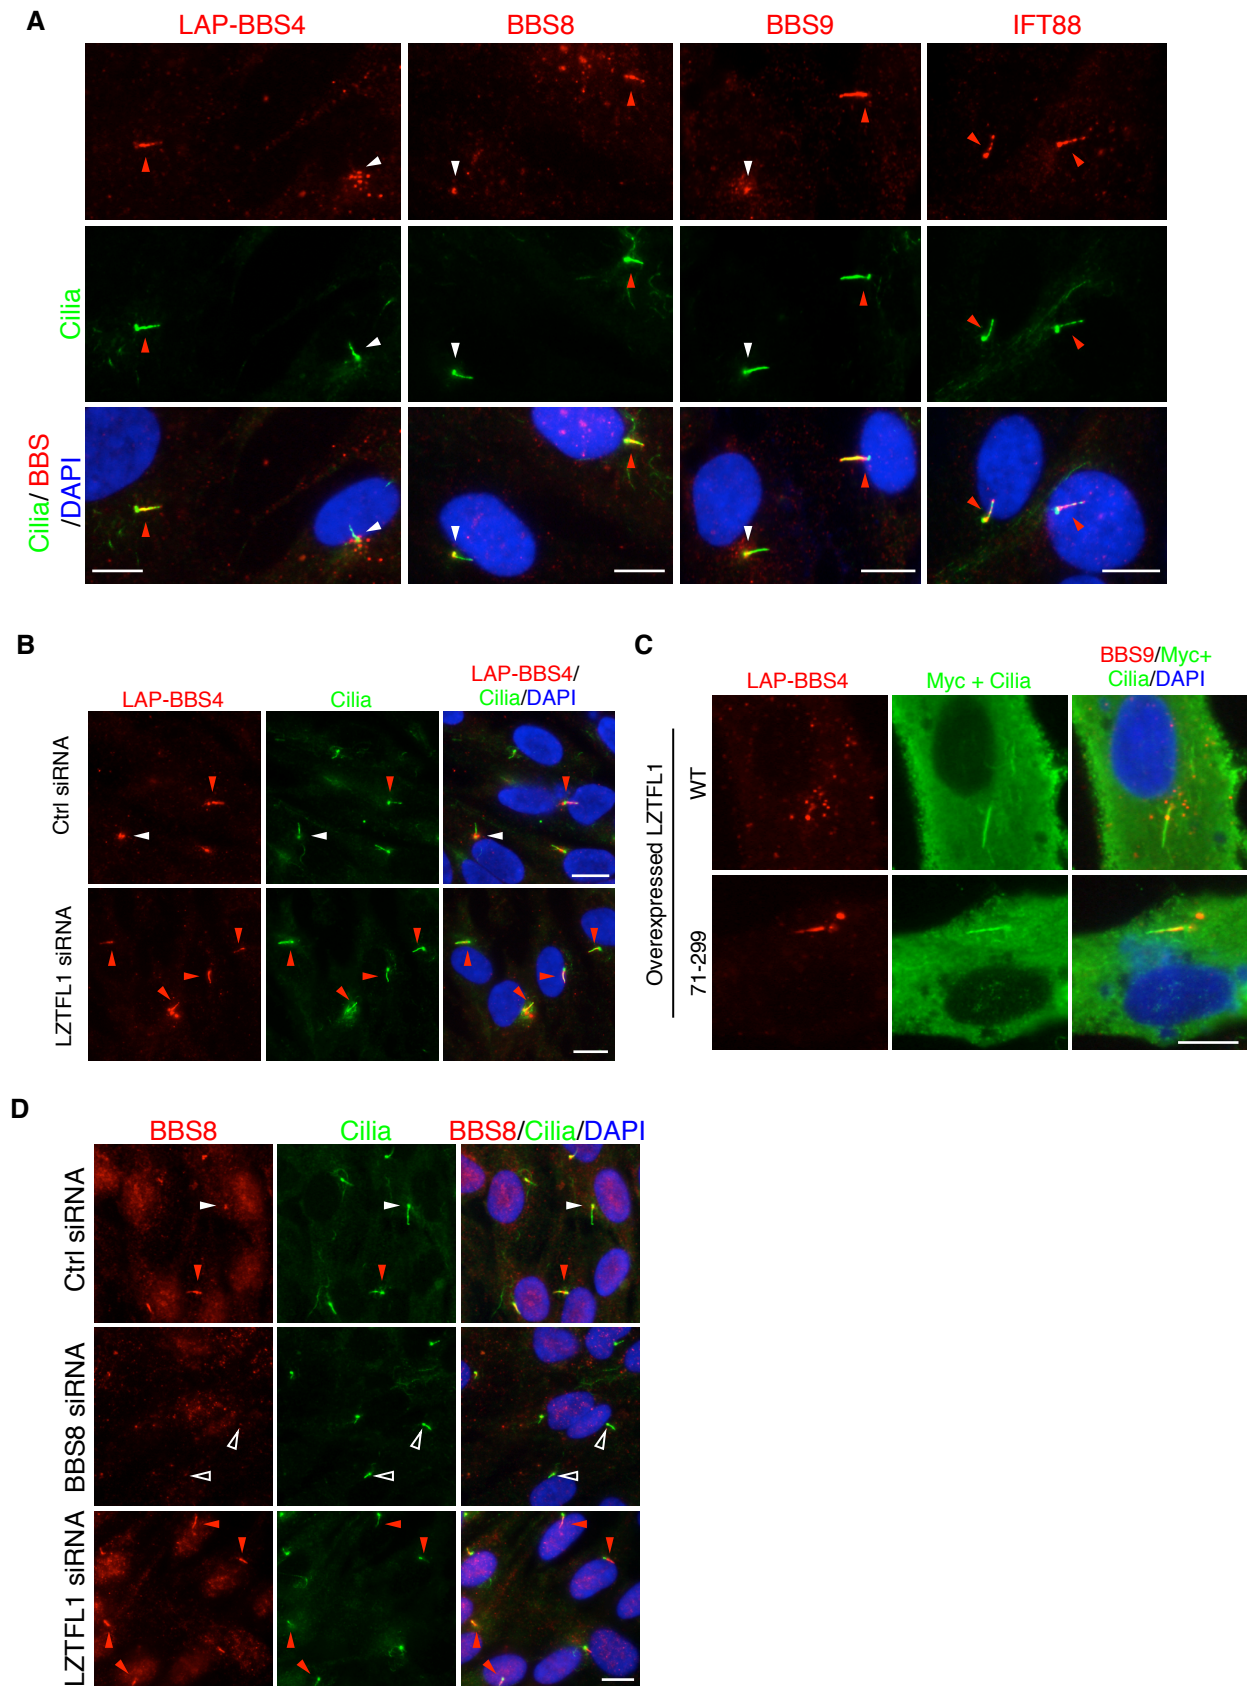

Supplement: pgen.1002358.s004.pdf [file pgen.1002358.s004.pdf]
