# Supplementary material for: A Novel Protein LZTFL1 Regulates Ciliary Trafficking of the BBSome and Smoothened
Source: PubMed Central journal article supplement (PMC3207910; doi:10.1371/journal.pgen.1002358), 2011-11-03

Figure S7

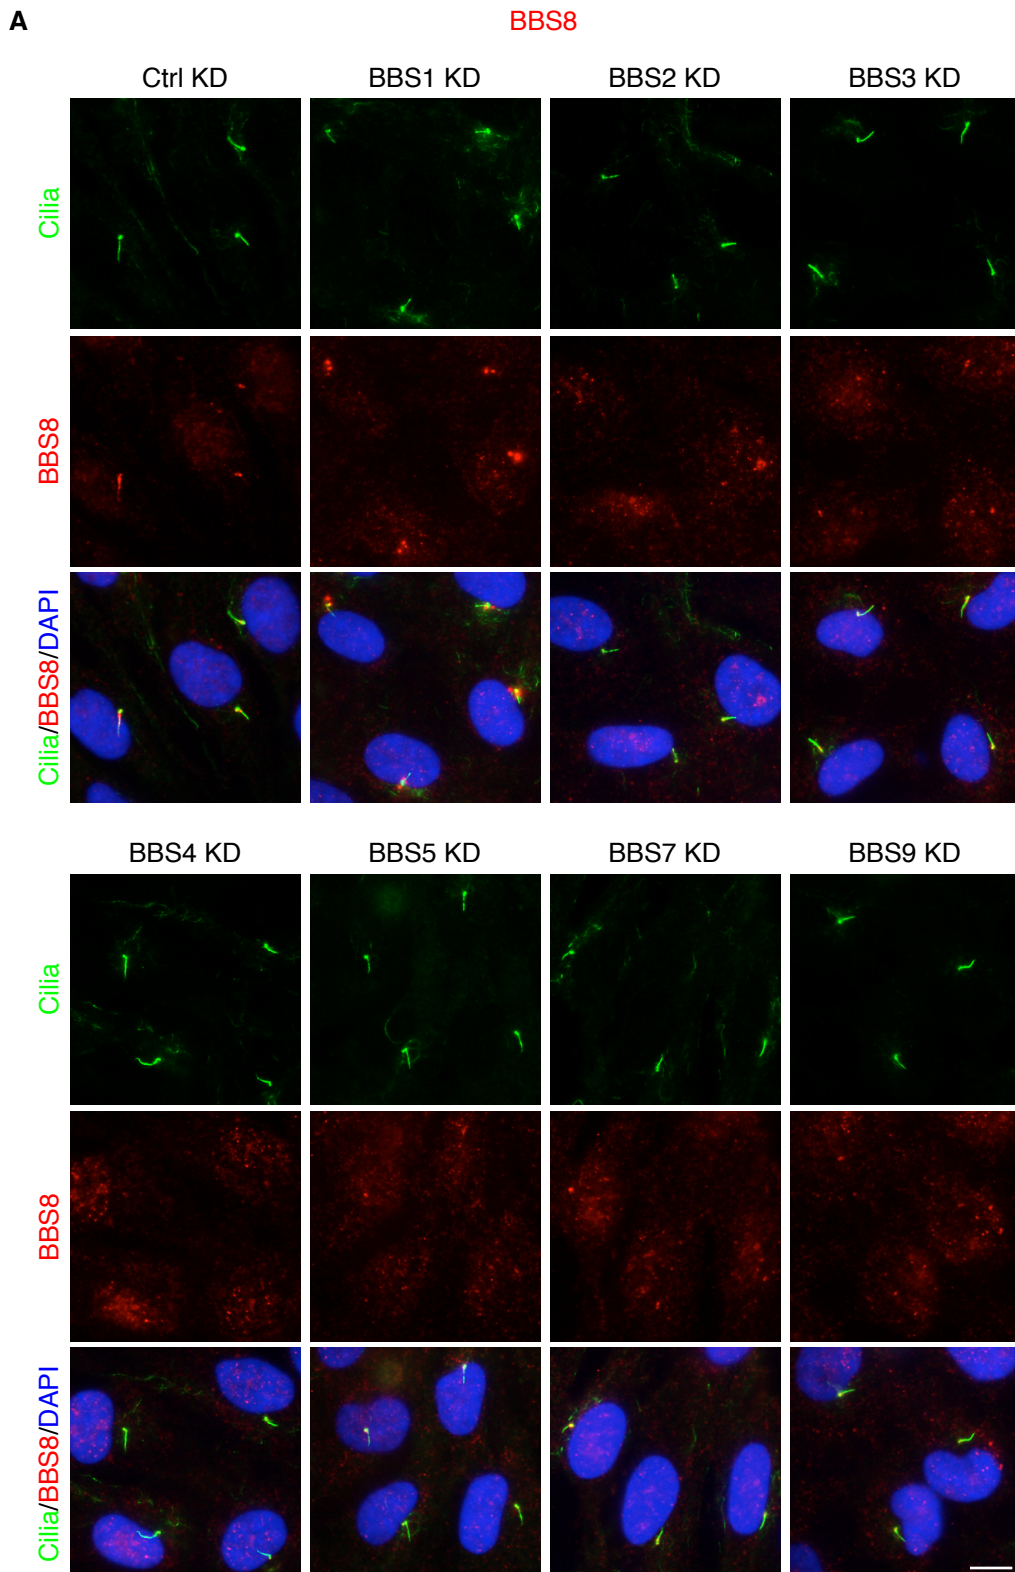

**B**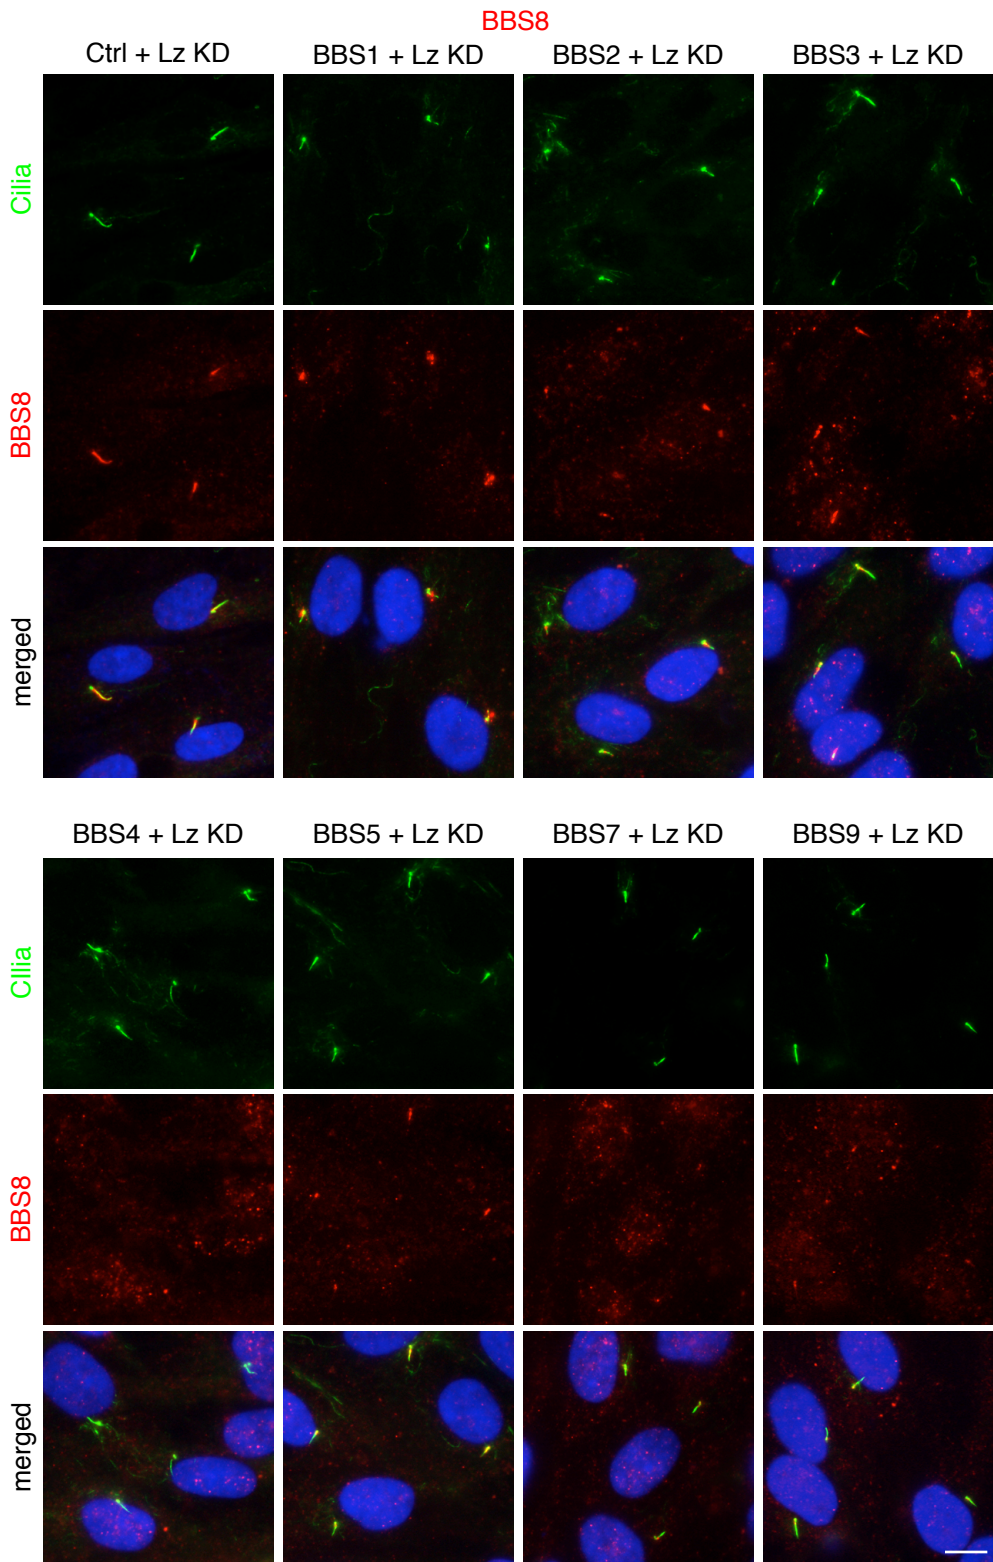

**C**

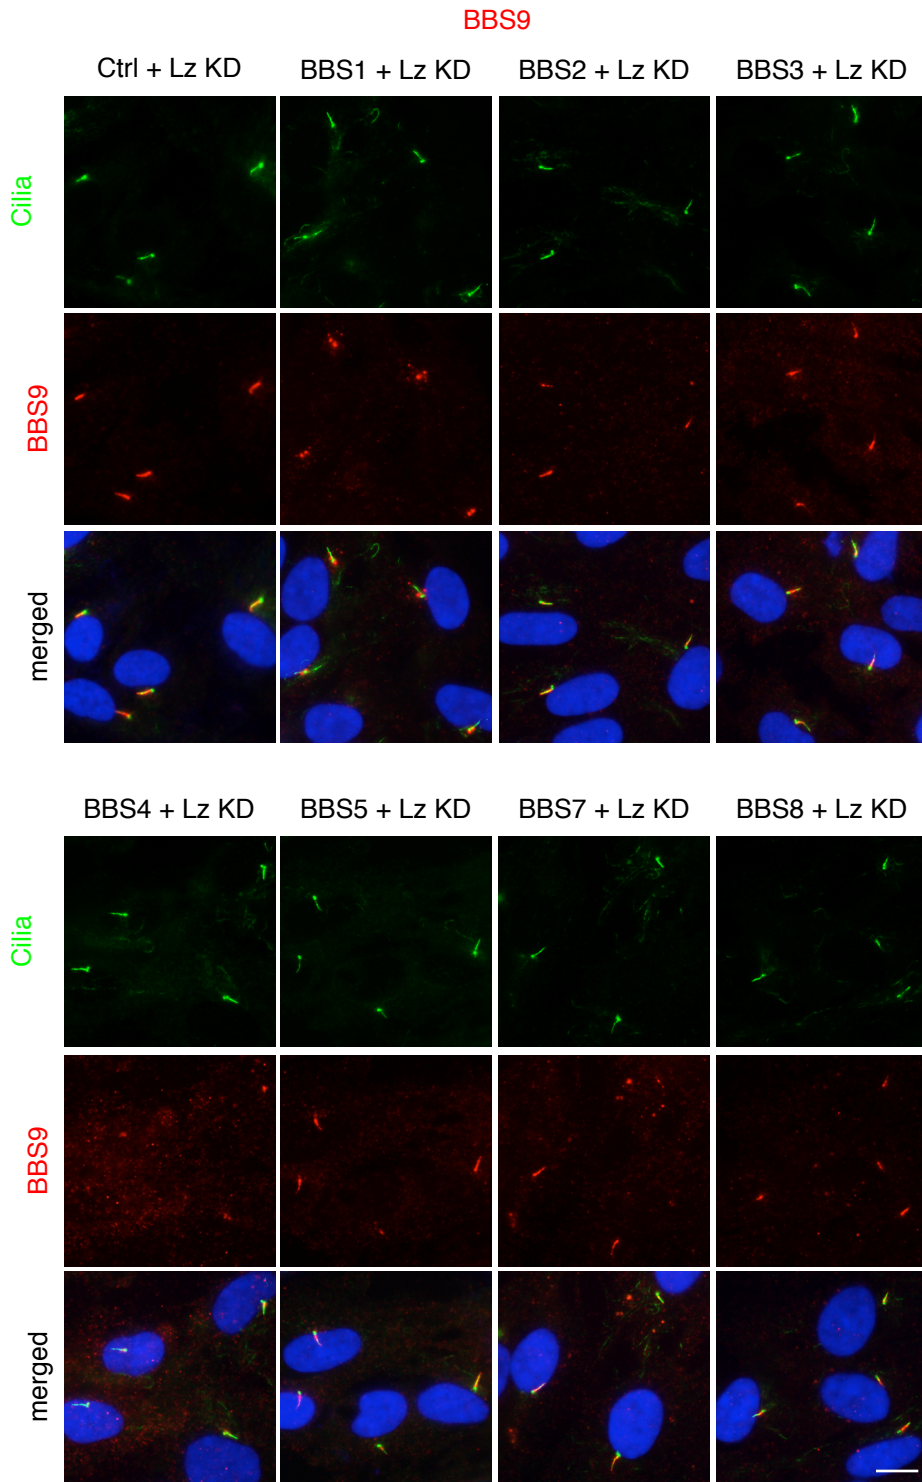

**D****BBS8 ciliary localization**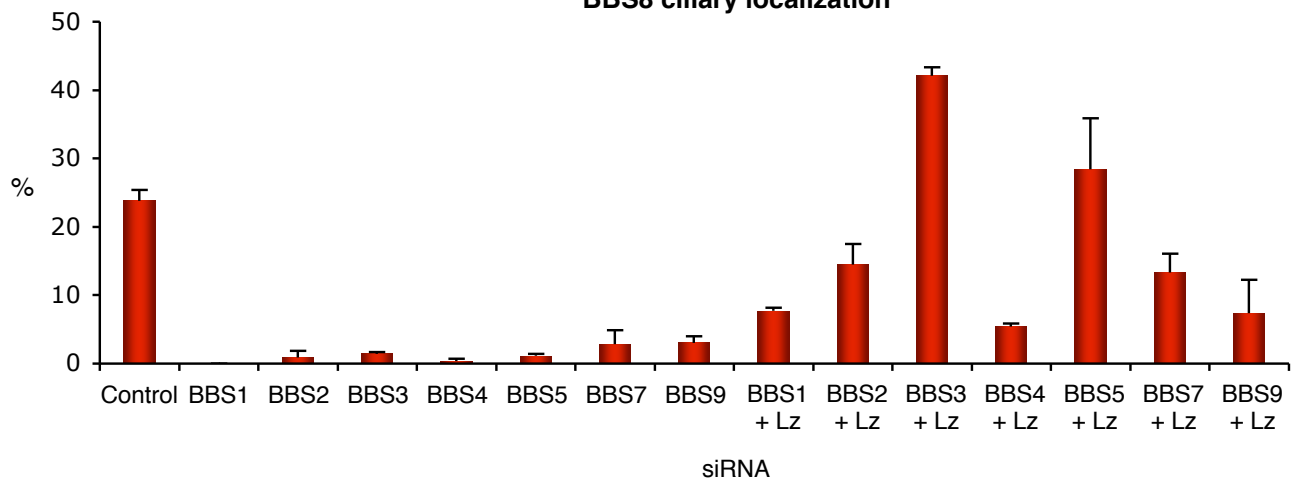**E****BBS9 ciliary localization**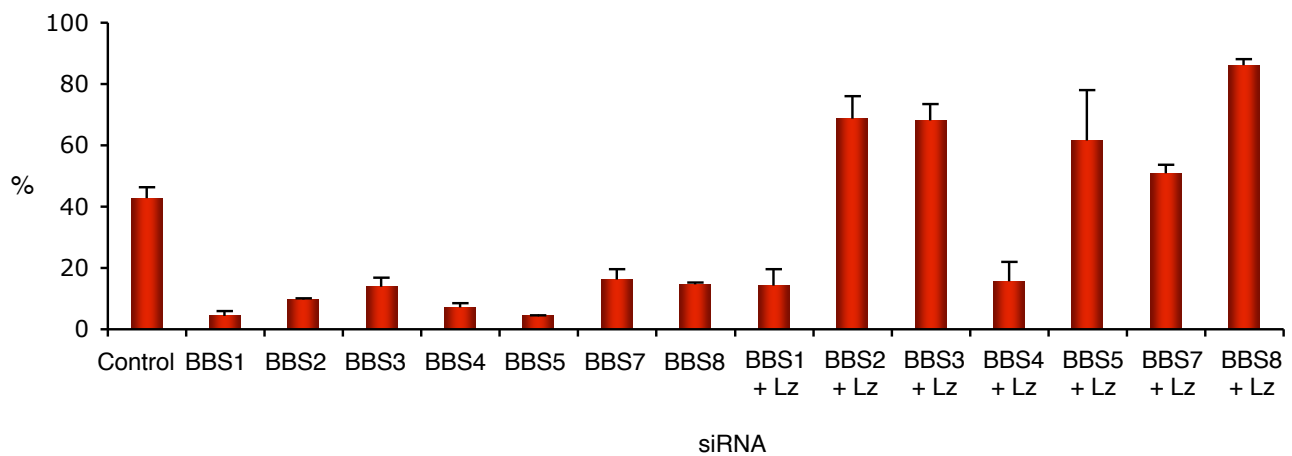

Supplement: pgen.1002358.s007.pdf [file pgen.1002358.s007.pdf]
